# Supplementary material for: Selective synthesis of α,β-unsaturated aldehydes from allylic alcohols using oxidatively supplied hydrogen peroxide from electrochemical two-electron water oxidation
Source: Royal Society of Chemistry journal article supplement (doi:10.1039/d4ra08368g), 2025-01-01
Supplement: d4ra08368g1.pdf [file d4ra08368g1.pdf]

Electronic Supplementary Information (ESI)

**Selective synthesis of  $\alpha,\beta$ -unsaturated aldehydes from allylic alcohols using oxidatively supplied hydrogen peroxide from electrochemical two-electron water oxidation**

Yoshihiro Kon,<sup>\*a,b</sup> Yuka Kimishima,<sup>a</sup> Kazuhisa Murata,<sup>b</sup> and Kazuhiro Sayama<sup>b</sup>

<sup>a</sup>Interdisciplinary Research Center for Catalytic Chemistry, National Institute of Advanced Industrial Science and Technology (AIST), Tsukuba, Ibaraki 305-8565, Japan.

<sup>b</sup>Global Zero Emission Research Center (GZR), National Institute of Advanced Industrial Science and Technology (AIST), Tsukuba West, 16-1 Onogawa, Tsukuba, Ibaraki, 305-8569 Japan.

**Contents**

|                                                                                                           |           |
|-----------------------------------------------------------------------------------------------------------|-----------|
| <b>1. Oxidation of geraniol using aqueous H<sub>2</sub>O<sub>2</sub> solution</b>                         | <b>S2</b> |
| <b>2. XRD spectra of (111) plane in Pt black</b>                                                          | <b>S3</b> |
| <b>3. Time dependence of potential about oxidative H<sub>2</sub>O<sub>2</sub> production on FTO anode</b> | <b>S4</b> |
| <b>4. NMR Spectra of <math>\alpha,\beta</math>-unsaturated aldehydes</b>                                  | <b>S5</b> |

## 1. Oxidation of geraniol using aqueous H<sub>2</sub>O<sub>2</sub> solution

Aqueous H<sub>2</sub>O<sub>2</sub> solution was made by adding K<sub>2</sub>CO<sub>3</sub> (3.5 mol/L) and KHCO<sub>3</sub> (0.5 mol/L) to an industrially purchased H<sub>2</sub>O<sub>2</sub> and it was diluted to aqueous H<sub>2</sub>O<sub>2</sub> solution (68 mmol/L) by an ion-exchange water.

**Table S1.** Screening of reaction time. <sup>a</sup>

| Entry | Time (h) | conv. of 1 (%) <sup>b</sup> | Yield of 2 (%) <sup>b</sup> | selectivity (%) <sup>c</sup> |
|-------|----------|-----------------------------|-----------------------------|------------------------------|
| 1     |          | 65                          | 62                          | 95                           |
| 2     | 0.3      | 62                          | 60                          | 97                           |
| 3     |          | 58                          | 58                          | >99                          |
| 4     |          | 81                          | 81                          | >99                          |
| 5     | 1        | 79                          | 79                          | >99                          |
| 6     |          | 76                          | 76                          | >99                          |
| 7     |          | 90                          | 88                          | 98                           |
| 8     | 2        | 86                          | 86                          | >99                          |
| 9     |          | 94                          | 93                          | >99                          |
| 10    |          | 87                          | 87                          | >99                          |
| 11    | 3        | 87                          | 87                          | >99                          |
| 12    |          | 88                          | 88                          | >99                          |

<sup>a</sup>Reaction conditions are as follows: **1** (0.15 mmol), Pt black (15 mg), toluene (0.50 mL), H<sub>2</sub>O<sub>2</sub> aq. by 2e-WOR (68 mmol/L, 2.2 ml, 0.15 mmol), 60 °C, 2.0 h. <sup>b</sup>Determined by GC analysis based on **1**. <sup>c</sup>Selectivity = (Yield of **2**) / (Conversion of **1**) x 100 (%).

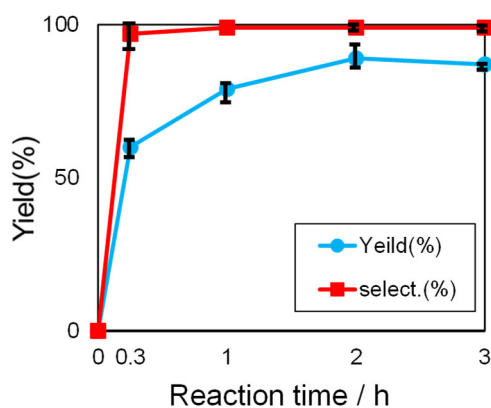

**Fig. S1.** Screening of reaction time (plots of yields of **2** and selectivity).

## 2. XRD spectra of (111) plane in Pt black

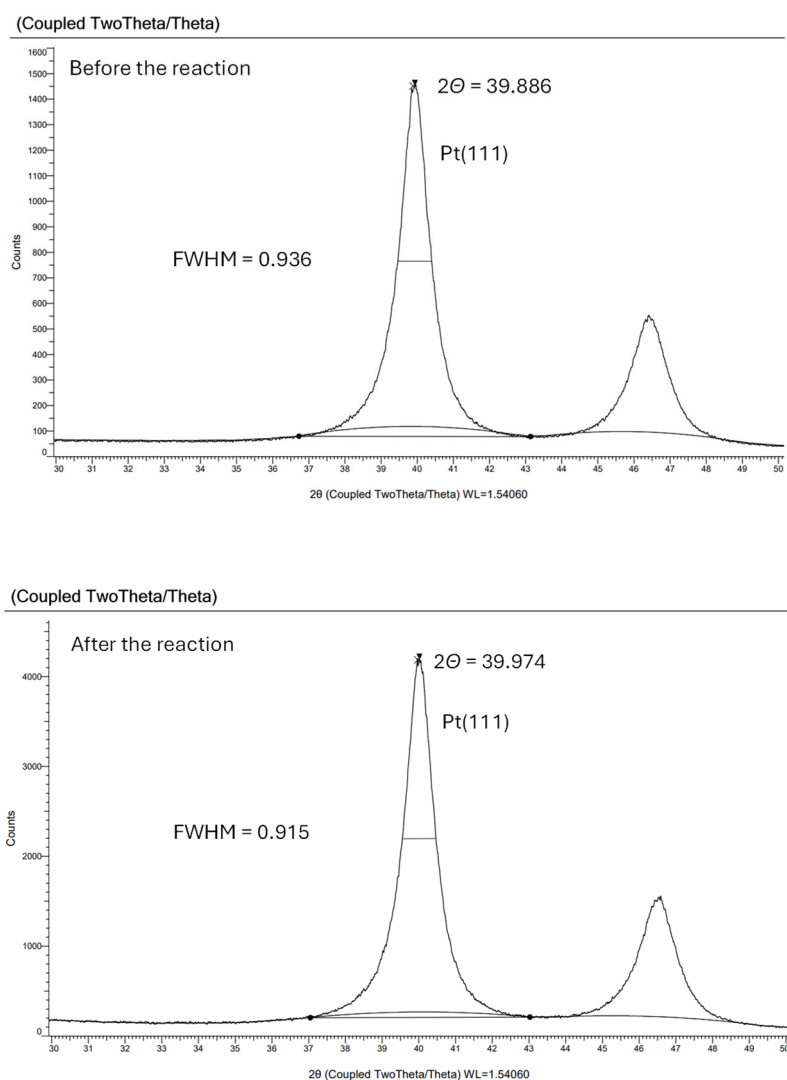

**Fig. S2.** XRD spectra of (111) plane in Pt black (upper: before the reaction, lower: after the reaction).

### 3. Time dependence of potential about oxidative $\text{H}_2\text{O}_2$ production on FTO anode

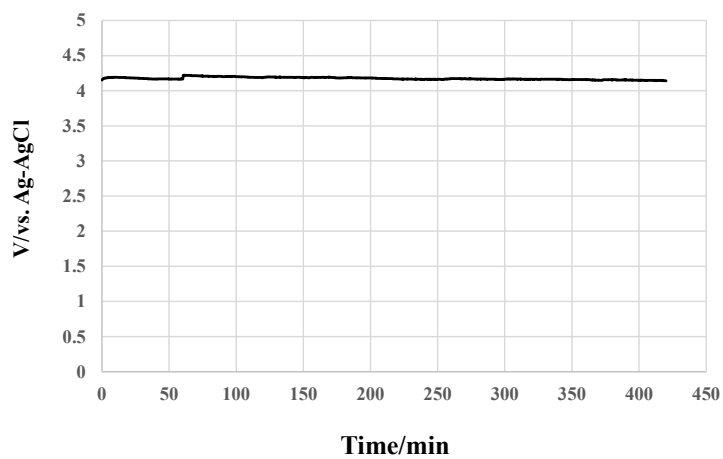

**Fig. S3.** Time dependence of potential about oxidative  $\text{H}_2\text{O}_2$  production on FTO anode at constant current (50 mA). Aqueous solution (3.5 mol/L) of  $\text{K}_2\text{CO}_3$ /0.5mol/L  $\text{KHCO}_3$  (pH 10.8) with an ice bath (3-5 °C).

#### 4. NMR Spectra of $\alpha,\beta$ -unsaturated aldehydes

The NMR spectroscopic data of the synthesized compounds **2**, **10–15** agreed well with the NMR data reported by the production through another methods.<sup>a-c</sup>

##### Geranial (**2**)<sup>a</sup>

<sup>1</sup>H NMR (400MHz, CDCl<sub>3</sub>, 25 °C)

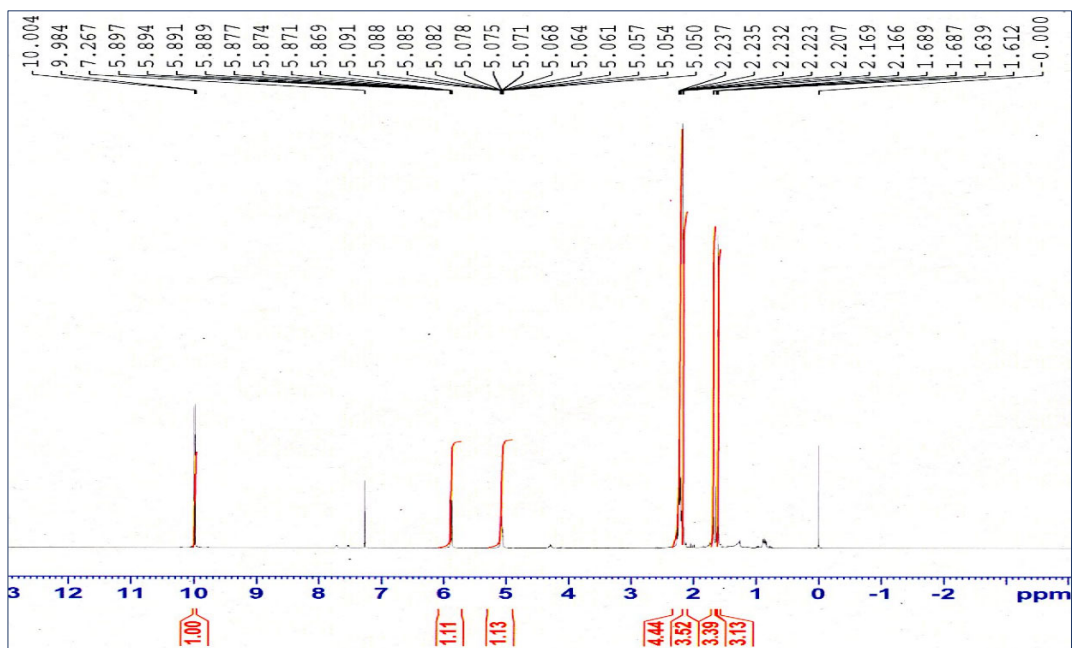

<sup>13</sup>C NMR (100MHz, CDCl<sub>3</sub>, 25 °C)

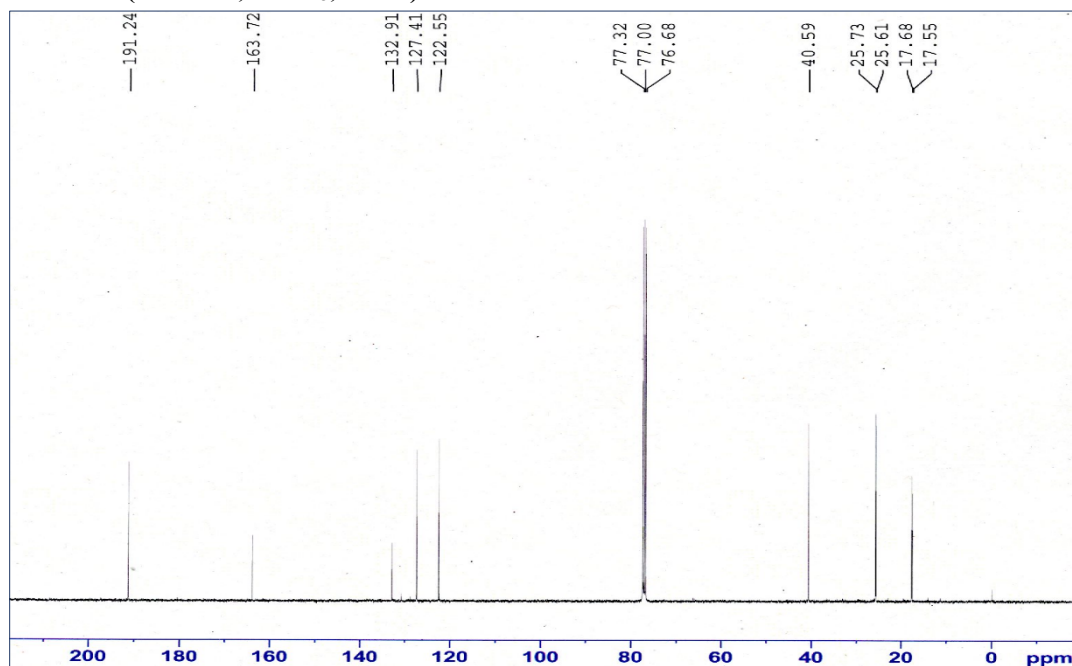

**(E)-2-octen-1-ol (10)<sup>b</sup>**

**<sup>1</sup>H NMR (400MHz, CDCl<sub>3</sub>, 25 °C)**

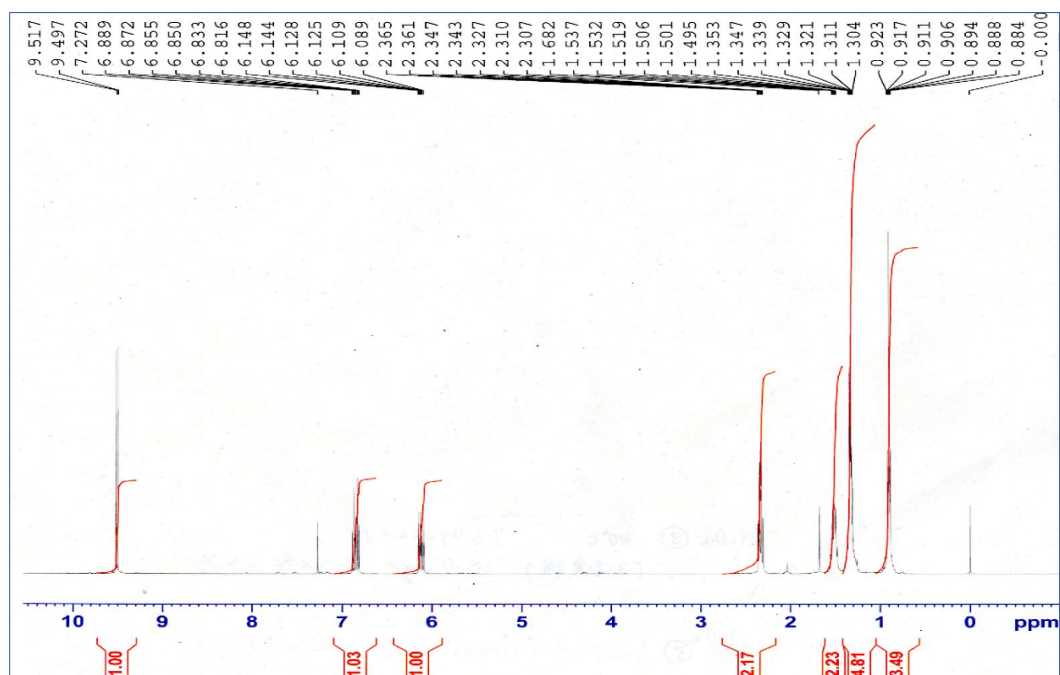

**<sup>13</sup>C NMR (100MHz, CDCl<sub>3</sub>, 25 °C)**

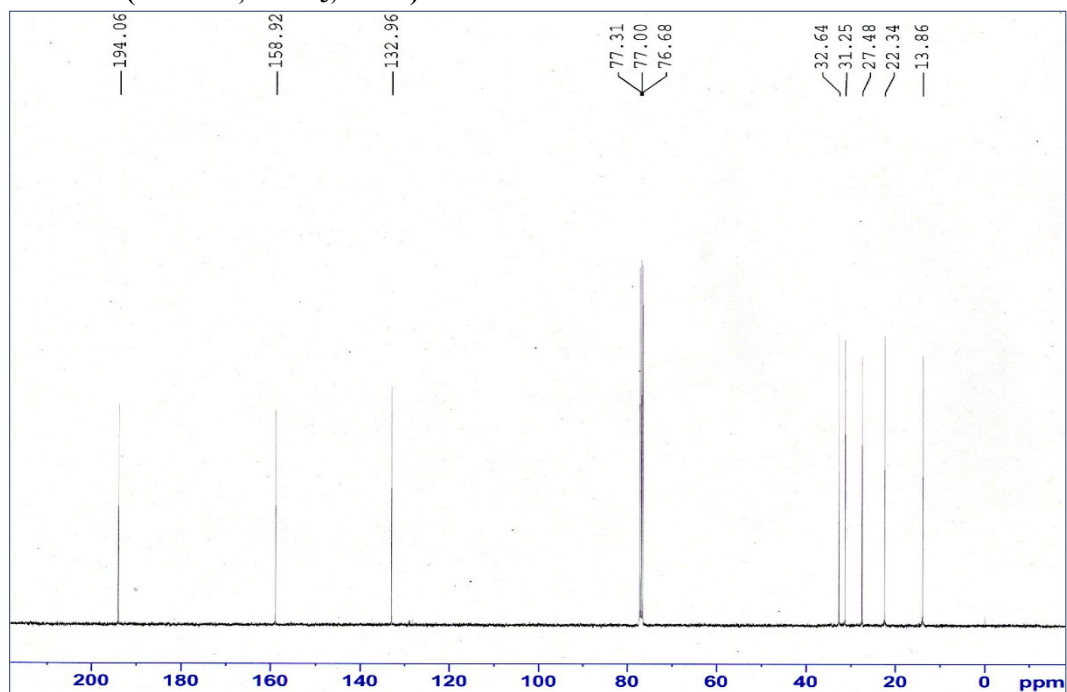

**(E)-2-nonen-1-al (11)<sup>b</sup>**

**<sup>1</sup>H NMR (400 MHz, CDCl<sub>3</sub>, 25 °C)**

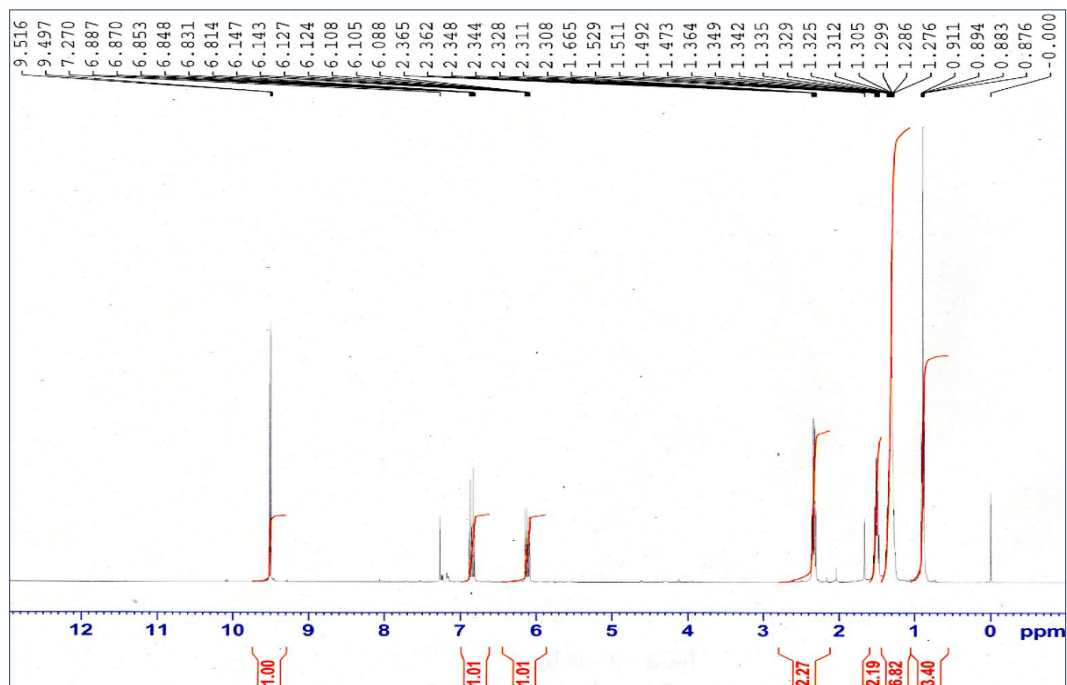

**<sup>13</sup>C NMR (100 MHz, CDCl<sub>3</sub>, 25 °C)**

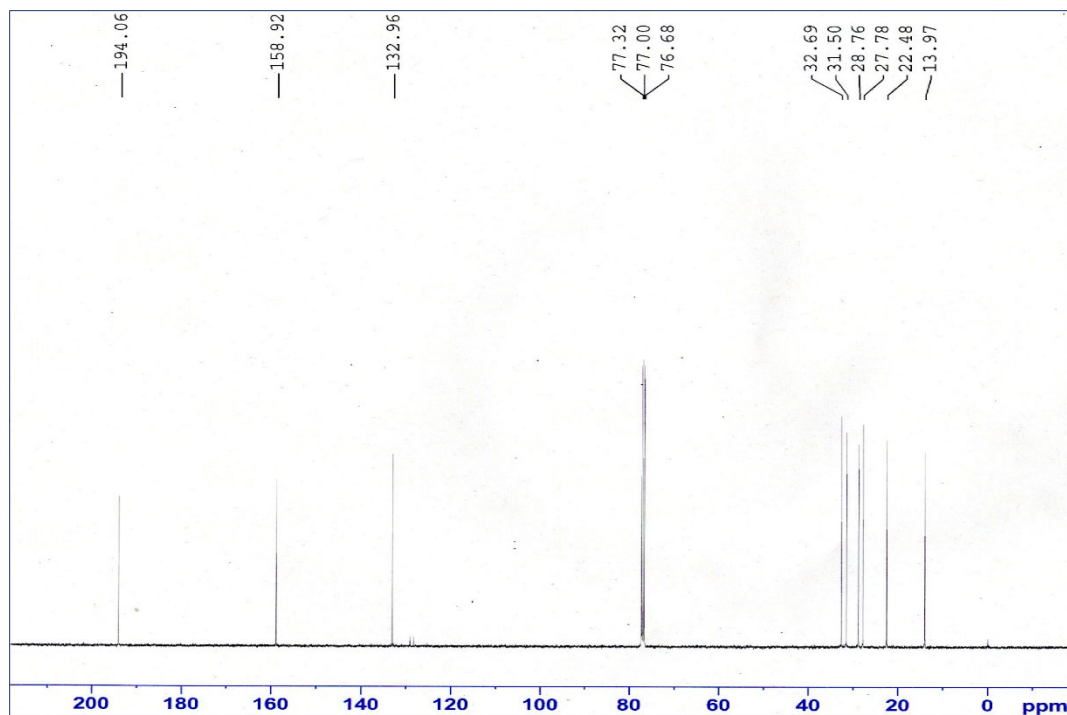

**(E)-2-dodecen-1-al (12)<sup>c</sup>**

**<sup>1</sup>H NMR (400 MHz, CDCl<sub>3</sub>, 25 °C)**

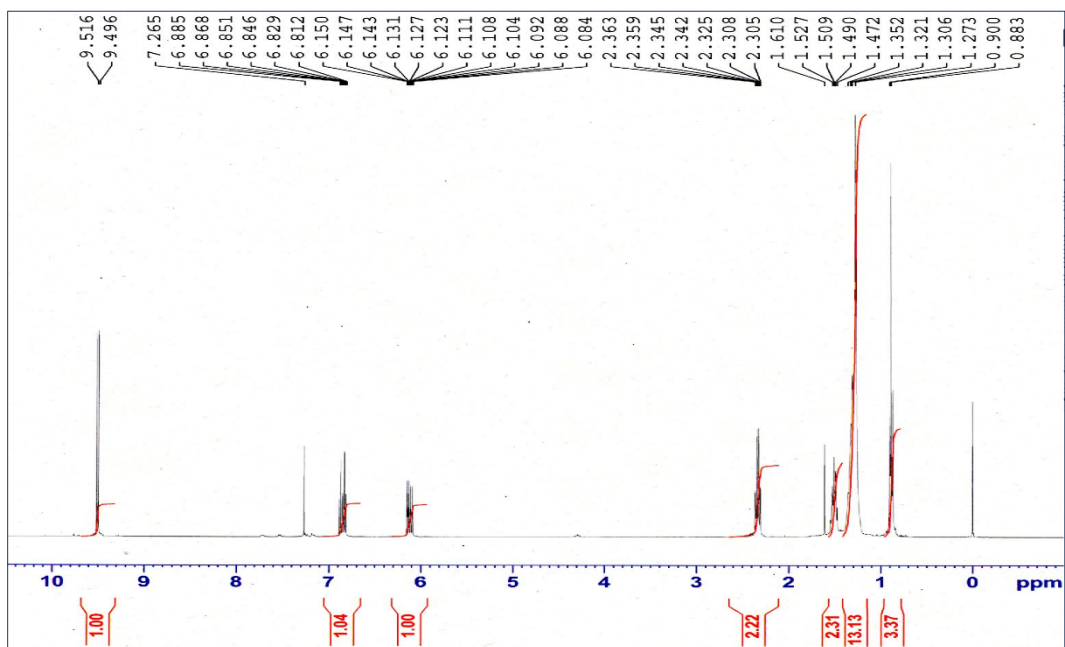

**<sup>13</sup>C NMR (100 MHz, CDCl<sub>3</sub>, 25 °C)**

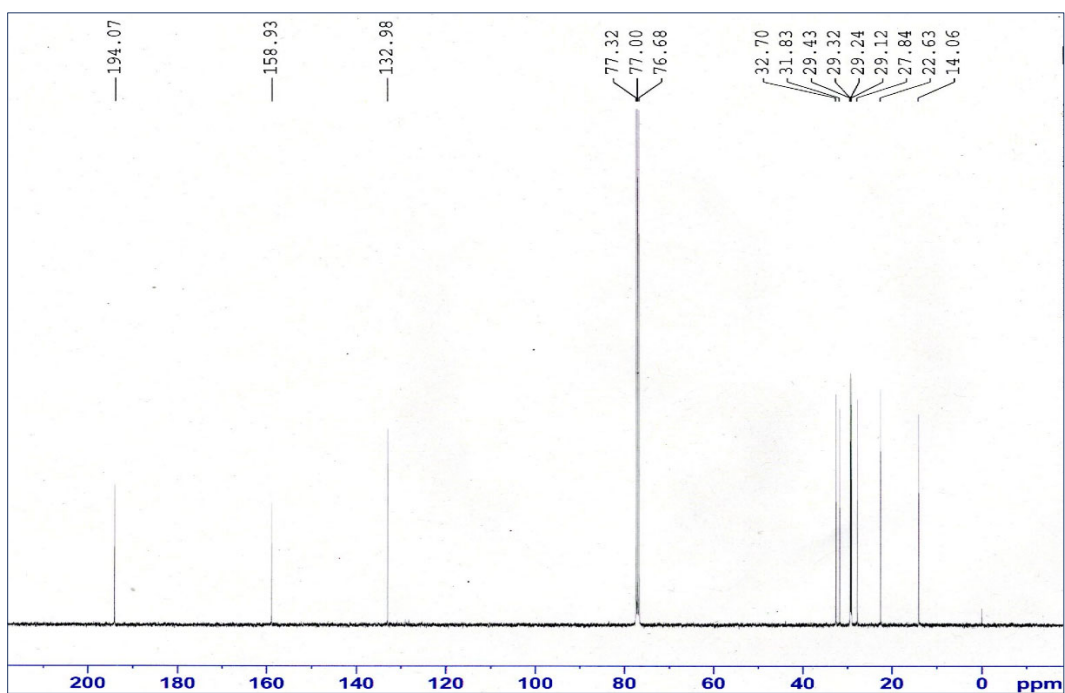



**(E)-cinnamaldehyde (13)<sup>b</sup>**

**<sup>1</sup>H NMR (400 MHz, CDCl<sub>3</sub>, 25 °C)**

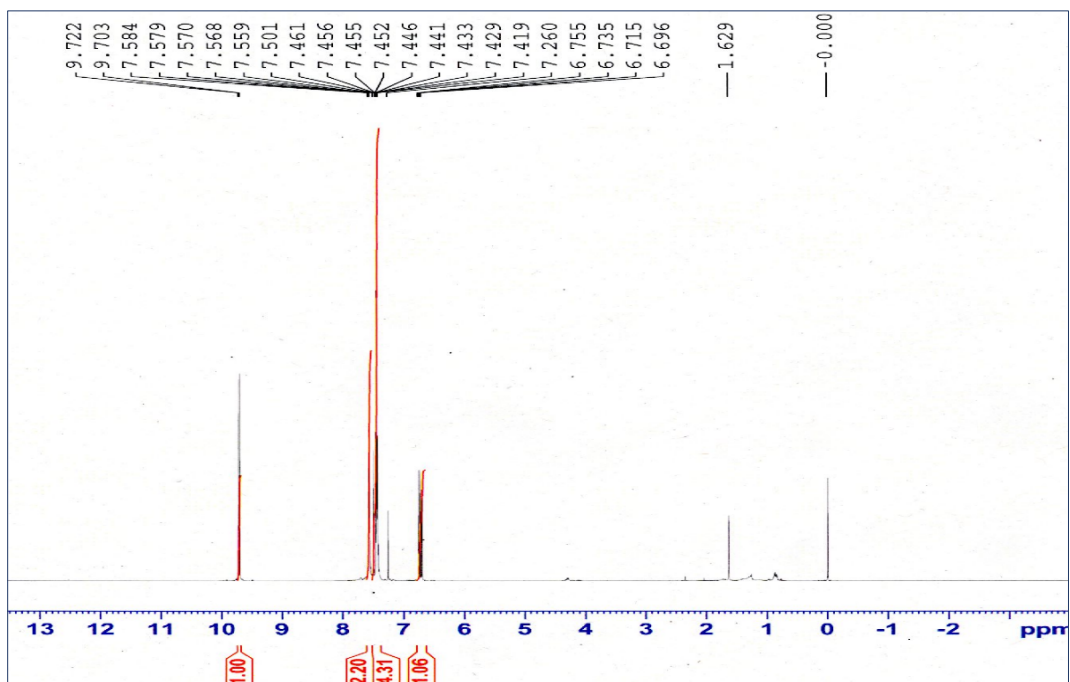

**<sup>13</sup>C NMR (100MHz, CDCl<sub>3</sub>, 25 °C)**

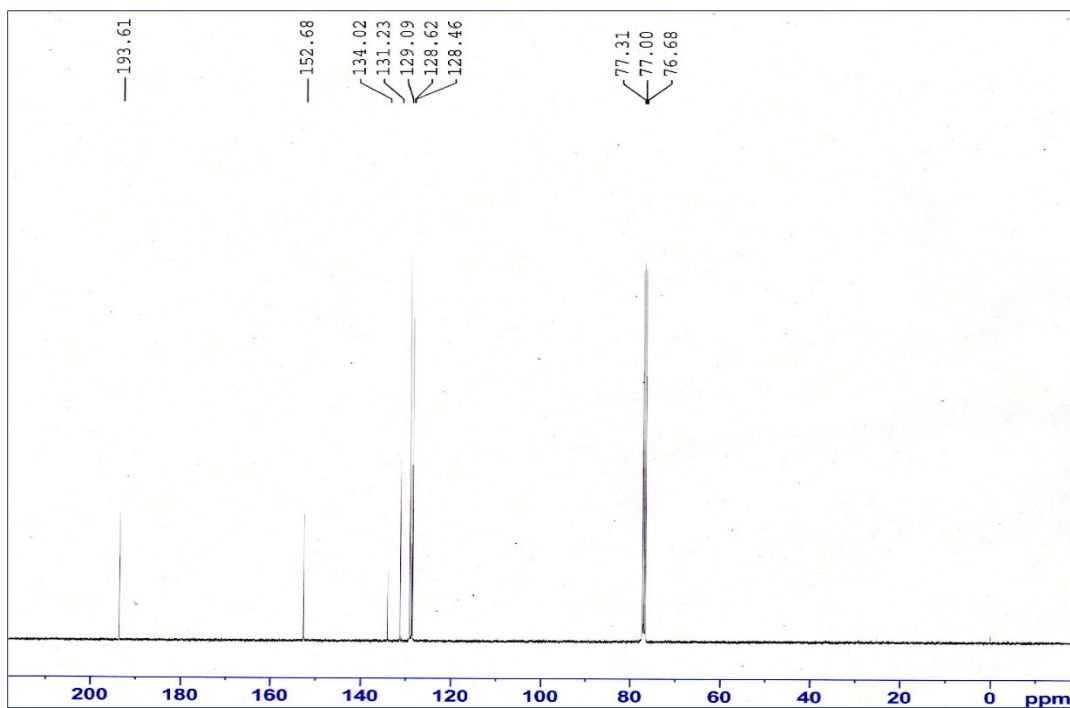

Perillaldehyde (14)<sup>b</sup>

<sup>1</sup>H NMR (400MHz, CDCl<sub>3</sub>, 25 °C)

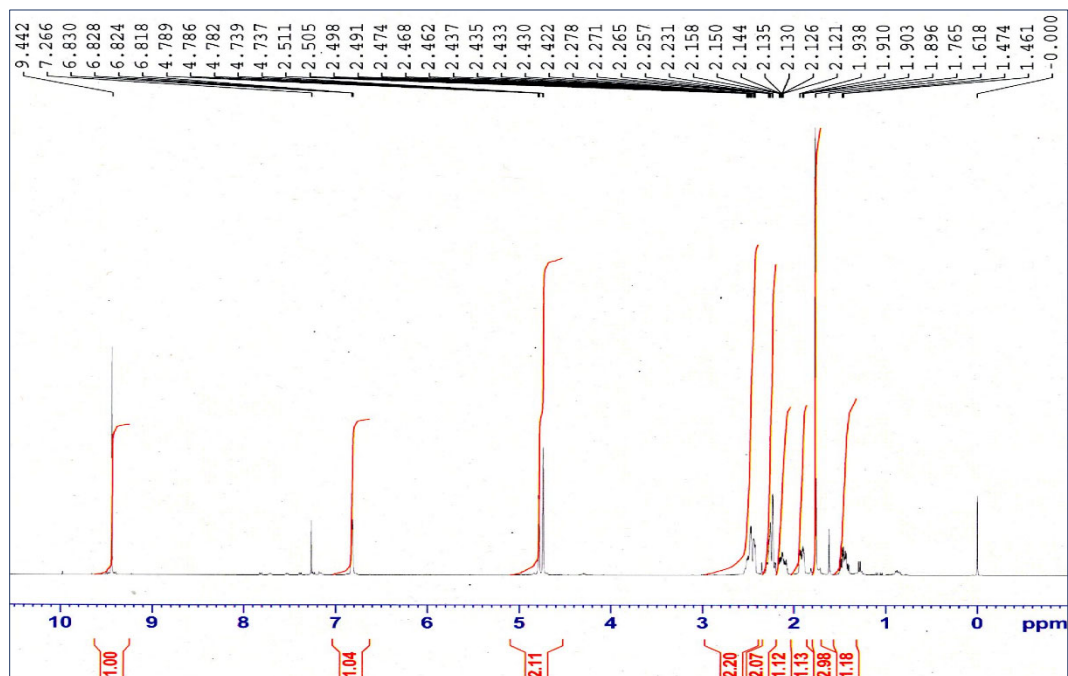

<sup>13</sup>C NMR (100MHz, CDCl<sub>3</sub>, 25 °C)

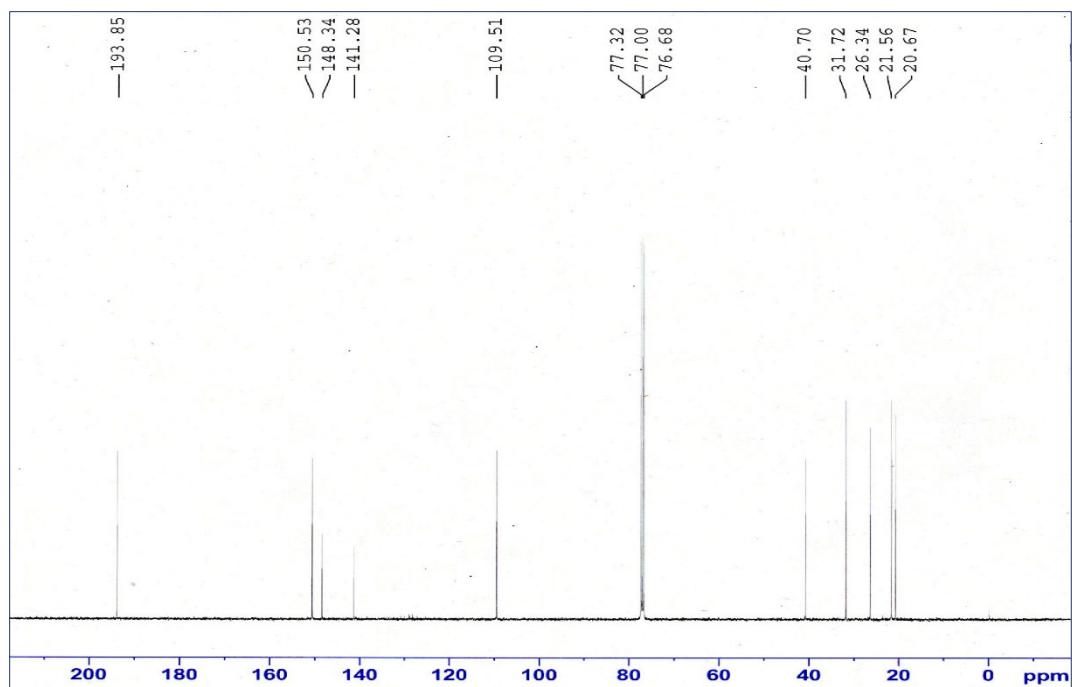

Myrtenal (15)<sup>b</sup>

<sup>1</sup>H NMR (400MHz, CDCl<sub>3</sub>, 25 °C)

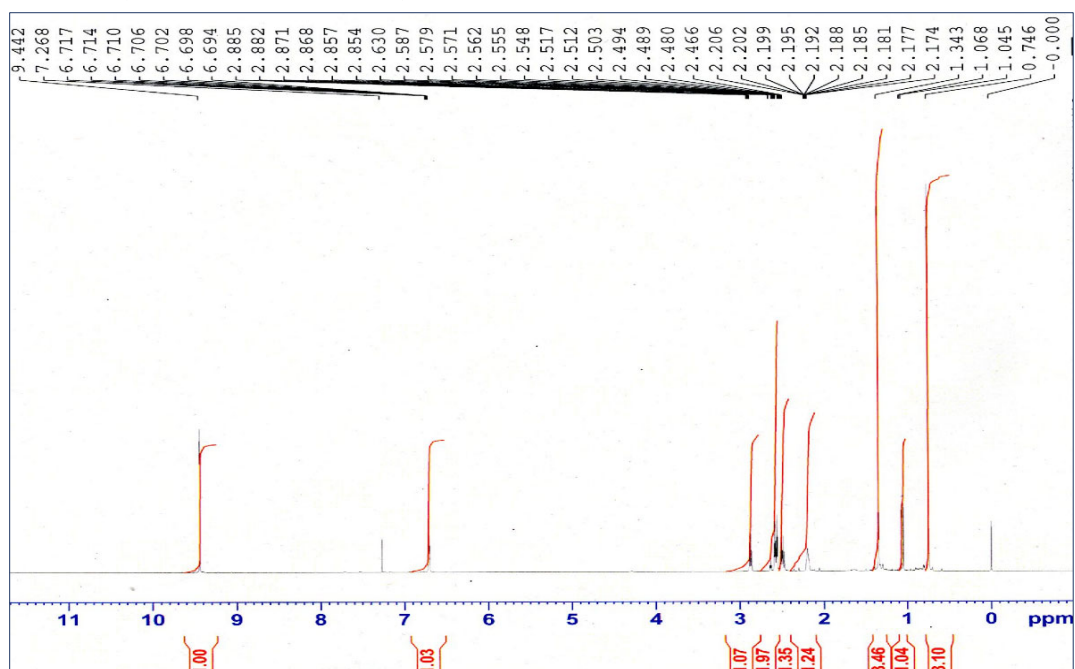

<sup>13</sup>C NMR (100 MHz, CDCl<sub>3</sub>, 25 °C)

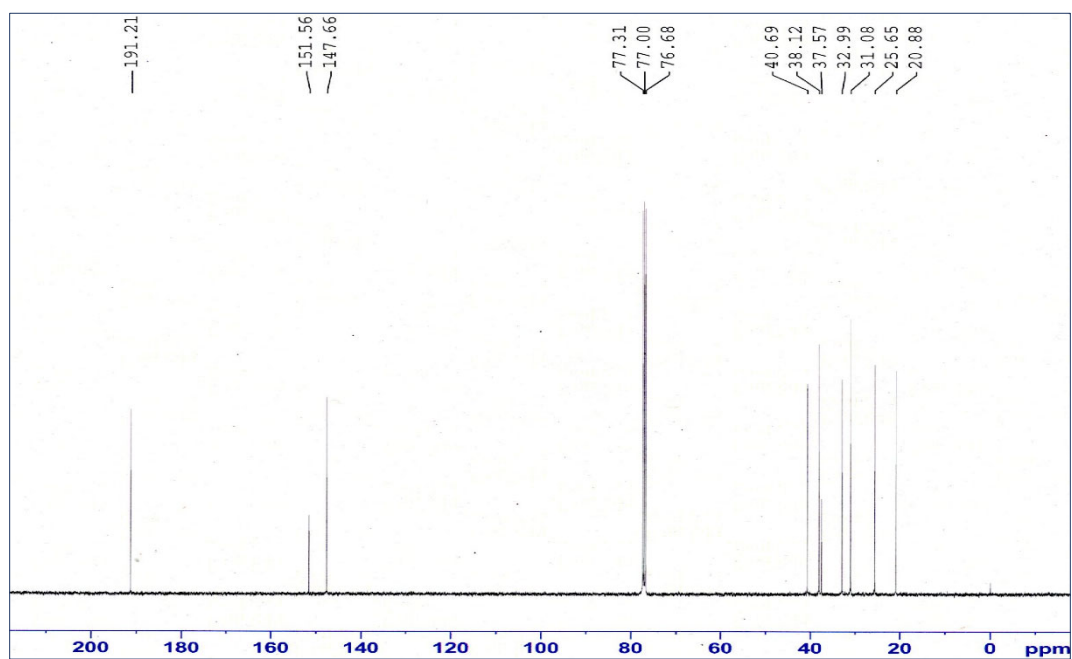

Ref. (a) J. Holz, S. Doerfelt and A. Börner, *Adv. Synth. Catal.*, 2017, **359**, 4379; (b) SDBSWeb: <https://sdfs.db.aist.go.jp> (National Institute of Advanced Industrial Science and Technology(AIST), Nov. 15, 2024); (c) T. Yoshida, M. Murai, M. Abe, N. Ichimaru, T. Harada, T. Nishioka and H. Miyoshi, *Biochem.*, 2007, **46**, 10365.
